# Supplementary material for: Systems Approaches Evaluating the Perturbation of Xenobiotic Metabolism in Response to Cigarette Smoke Exposure in Nasal and Bronchial Tissues
Source: Hindawi journal article supplement (doi:10.1155/2013/512086), 2013-01-01
Supplement: f1 [file 512086.f1.pdf]

# Distribution of the Correlations Based on Permuted Downstream Genes

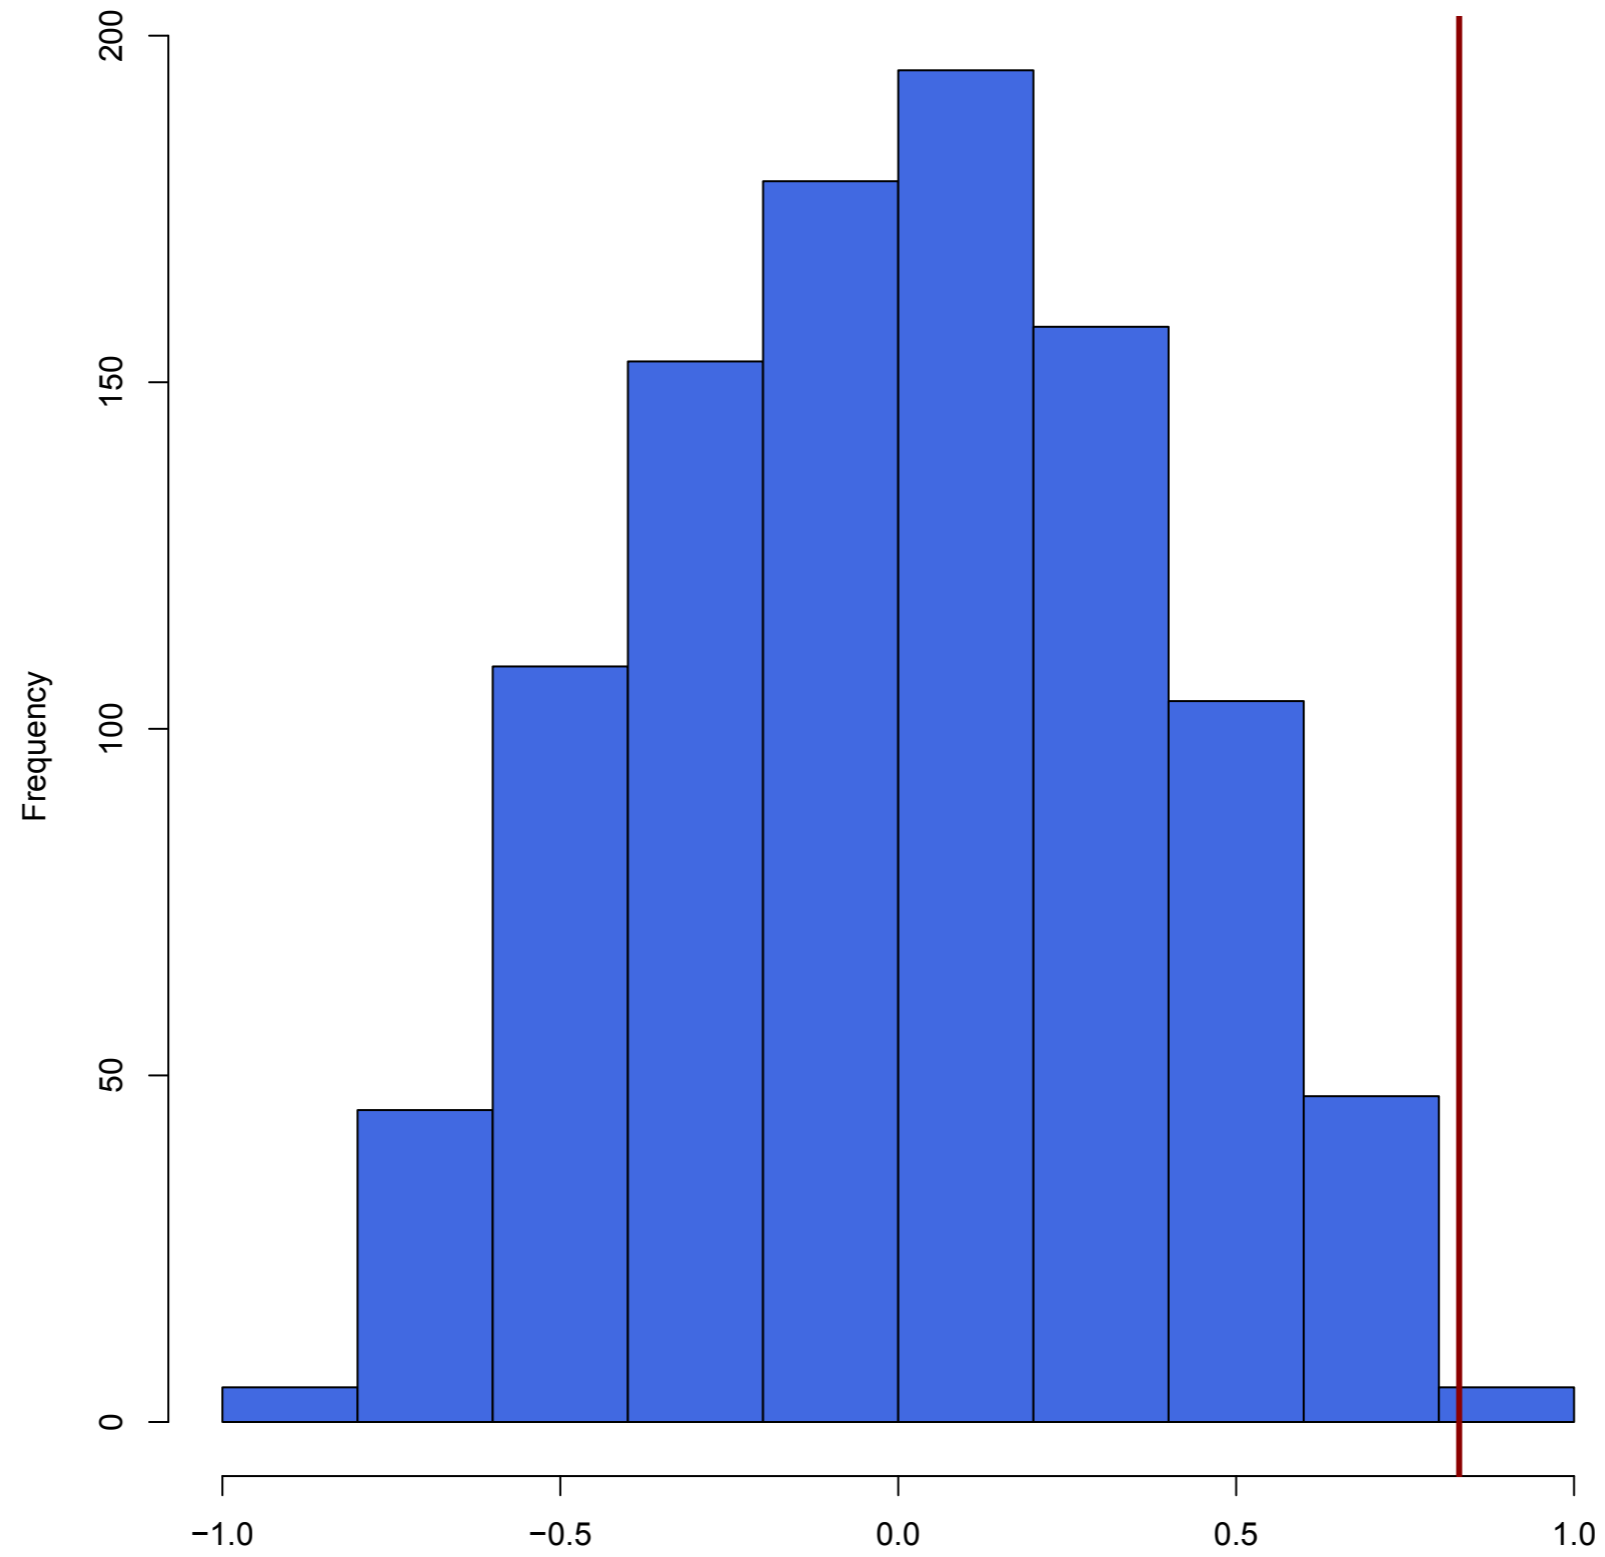

Pearson Correlation  
Red line indicates the actual correlation value
